# Supplementary material for: A comparative study of survival models for breast cancer prognostication revisited: the benefits of multi-gene models
Source: PubMed Central journal article supplement (PMC6215649; doi:10.1186/s12859-018-2430-9), 2018-11-03
Supplement: 12859_2018_2430_MOESM1_ESM.pdf [file 12859_2018_2430_MOESM1_ESM.pdf]

**Table S1.** A list of the twelve partitions of the breast cancer meta-dataset used in this study, with the proportion of the total number of patients (4,960) used for testing in each partition.

| Label | Training Datasets                                                                                       | Testing Datasets                                                                                                  | Testing Proportion |
|-------|---------------------------------------------------------------------------------------------------------|-------------------------------------------------------------------------------------------------------------------|--------------------|
| P1    | Chin, Desmedt-1, Desmedt-2, Hatzis-1, Metabric-Training, Pawitan, Sabatier, Symmans-MDA                 | Bild, Hatzis-2, Ivshina, Metabric-Validation, Miller, Schmidt, Sotiriou, Symmans-JBI, Wang, Zhang                 | 0.527              |
| P2    | Chin, Desmedt-1, Hatzis-2, Ivshina, Metabric-Training, Pawitan, Schmidt, Sotiriou, Symmans-JBI, Wang    | Bild, Desmedt-2, Hatzis-1, Metabric-Validation, Miller, Sabatier, Symmans-MDA, Zhang                              | 0.481              |
| P3    | Chin, Hatzis-2, Ivshina, Metabric-Training, Pawitan, Sabatier, Schmidt, Wang, Zhang                     | Bild, Desmedt-1, Desmedt-2, Hatzis-1, Metabric-Validation, Miller, Sotiriou, Symmans-JBI, Symmans-MDA             | 0.475              |
| P4    | Bild, Chin, Desmedt-2, Ivshina, Metabric-Training, Miller, Schmidt, Sotiriou, Symmans-MDA, Wang         | Desmedt-1, Hatzis-1, Hatzis-2, Metabric-Validation, Pawitan, Sabatier, Symmans-JBI, Zhang                         | 0.466              |
| P5    | Bild, Desmedt-1, Desmedt-2, Hatzis-1, Metabric-Validation, Miller, Pawitan, Sotiriou, Symmans-JBI, Wang | Chin, Hatzis-2, Ivshina, Metabric-Training, Sabatier, Schmidt, Symmans-MDA, Zhang                                 | 0.475              |
| P6    | Bild, Desmedt-2, Ivshina, Metabric-Training, Miller, Sabatier, Schmidt, Sotiriou, Symmans-MDA, Zhang    | Chin, Desmedt-1, Hatzis-1, Hatzis-2, Metabric-Validation, Pawitan, Symmans-JBI, Wang                              | 0.471              |
| P7    | Bild, Chin, Hatzis-1, Hatzis-2, Metabric-Training, Miller, Pawitan, Schmidt                             | Desmedt-1, Desmedt-2, Ivshina, Metabric-Validation, Sabatier, Sotiriou, Symmans-JBI, Symmans-MDA, Wang, Zhang     | 0.519              |
| P8    | Chin, Desmedt-1, Hatzis-2, Metabric-Validation, Miller, Pawitan, Schmidt, Symmans-MDA, Zhang            | Bild, Desmedt-2, Hatzis-1, Ivshina, Metabric-Training, Sabatier, Sotiriou, Symmans-JBI, Wang                      | 0.507              |
| P9    | Desmedt-1, Hatzis-1, Ivshina, Metabric-Validation, Pawitan, Wang, Zhang                                 | Bild, Chin, Desmedt-2, Hatzis-2, Metabric-Training, Miller, Sabatier, Schmidt, Sotiriou, Symmans-JBI, Symmans-MDA | 0.530              |
| P10   | Bild, Chin, Hatzis-1, Hatzis-2, Metabric-Training, Pawitan, Sabatier, Symmans-MDA                       | Desmedt-1, Desmedt-2, Ivshina, Metabric-Validation, Miller, Schmidt, Sotiriou, Symmans-JBI, Wang, Zhang           | 0.517              |
| P11   | Bild, Chin, Desmedt-1, Ivshina, Metabric-Training, Pawitan, Symmans-JBI, Symmans-MDA, Wang              | Desmedt-2, Hatzis-1, Hatzis-2, Metabric-Validation, Miller, Sabatier, Schmidt, Sotiriou, Zhang                    | 0.509              |
| P12   | Chin, Hatzis-1, Ivshina, Metabric-Training, Sabatier, Sotiriou, Symmans-JBI, Wang, Zhang                | Bild, Desmedt-1, Desmedt-2, Hatzis-2, Metabric-Validation, Miller, Pawitan, Schmidt, Symmans-MDA                  | 0.493              |

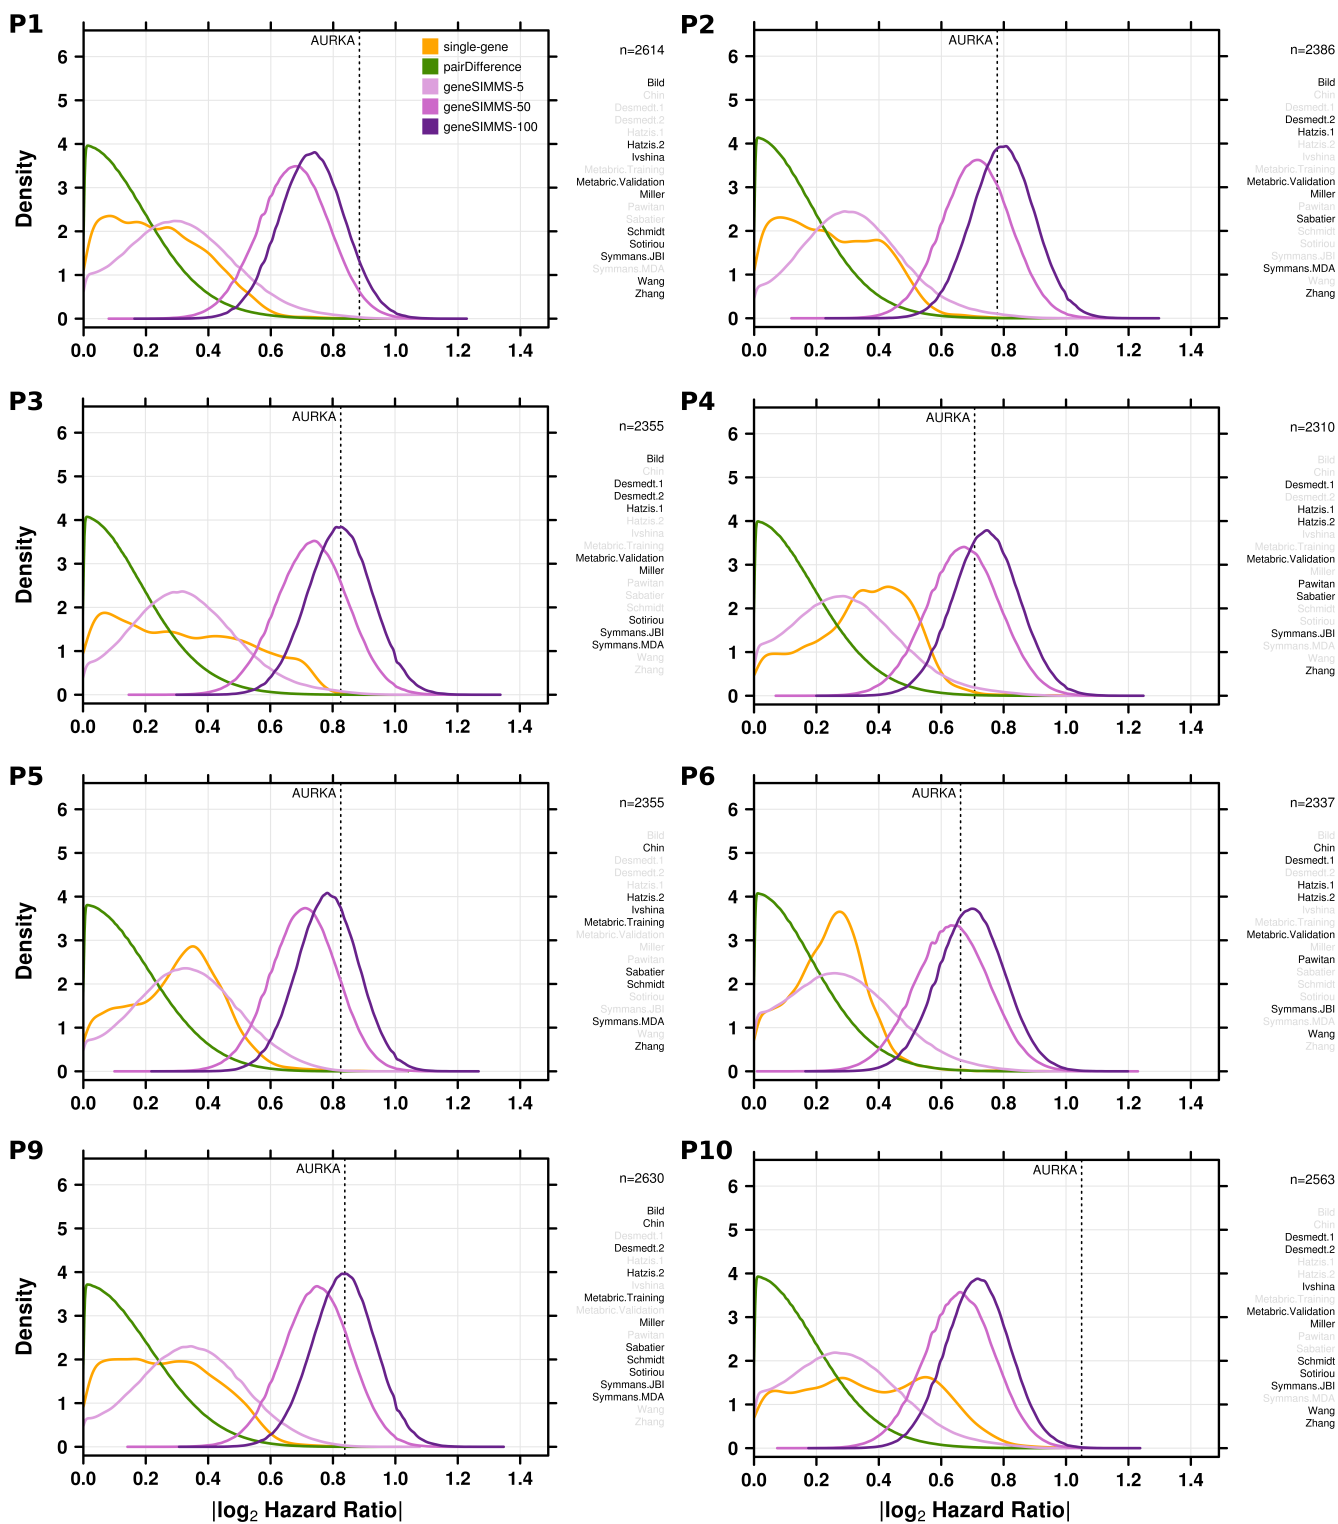

**Figure S1.** The distribution of biomarker performance on each of the three models tested in the meta-dataset for partitions not shown in Fig. 2. GeneSIMMS biomarkers are separated according to size and the performance of the single-gene AURKA model is highlighted. Highlighted datasets were used for testing in each partition. The total number of patients in the testing cohort is also given.
